# Supplementary material
Source: PubMed Central journal article supplement (PMC3698993)
Supplement: supp_kws448_kws448_Web_Tables.pdf [file supp_kws448_kws448_Web_Tables.pdf]

Web Table 1. Demographic Characteristics of Persons with Any Steatosis, NAFLD, and Non-NAFLD Steatosis in the U.S Population, NHANES III, 1988-1994, Adults 20-74 years of age.

| Characteristic         | % Sample | Prevalence of Steatosis | Prevalence of NAFLD | Prevalence of Steatosis-No NAFLD |
|------------------------|----------|-------------------------|---------------------|----------------------------------|
| All                    |          | 21.4 (19.7-23.1)        | 19.0 (17.5-20.6)    | 2.4 (1.8-3.1)                    |
| Race or ethnicity      |          |                         |                     |                                  |
| Non Hispanic Whites    | 77.7     | 20.8 (18.9-22.7)        | 18.4 (16.8-20.2)    | 2.4 (1.7-3.3)                    |
| Non Hispanic Blacks    | 10.0     | 18.2 (15.5-20.9)        | 16.3 (14.1-18.9)    | 1.9 (1.3-2.7)                    |
| Mexican American       | 5.0      | 32.0 (28.0-36.0)        | 29.2 (25.5-33.2)    | 2.8 (2.2-3.7)                    |
| <i>P</i> value         |          | <b>0.002</b>            | <b>0.002</b>        | 0.68                             |
| Sex                    |          |                         |                     |                                  |
| Male                   | 48.1     | 24.4 (22.0-26.7)        | 20.9 (18.8-23.1)    | 3.5 (2.6-4.8)                    |
| Female                 | 51.9     | 18.6 (17.0-20.2)        | 17.2 (15.8-18.8)    | 1.4 (0.9-2.0)                    |
| <i>P</i> value         |          | <b>&lt;0.001</b>        | <b>0.003</b>        | <b>&lt;0.001</b>                 |
| Poverty <sup>a</sup>   |          |                         |                     |                                  |
| Poor                   | 10.8     | 25.8 (22.6-29.4)        | 22.8 (20.0-25.9)    | 3.0 (1.9-4.9)                    |
| Near poverty level     | 19.0     | 23.0 (19.6-26.8)        | 20.8 (17.7-24.2)    | 2.3 (1.6-3.2)                    |
| Above poverty level    | 70.3     | 20.2 (18.3-22.3)        | 17.9 (16.1-19.8)    | 2.4 (1.7-3.4)                    |
| <i>P</i> value         |          | 0.15                    | 0.12                | 0.75                             |
| Education              |          |                         |                     |                                  |
| ≤12 years              | 57.9     | 23.9 (21.97-25.9)       | 21.2 (19.6-23.0)    | 2.7 (2.0-3.7)                    |
| 12 years               | 42.1     | 17.6 (15.3-19.9)        | 15.6 (13.8-17.6)    | 2.1 (1.4-3.0)                    |
| <i>P</i> value         |          | <b>&lt;0.001</b>        | <b>&lt;0.001</b>    | 0.08                             |
| Area of residence      |          |                         |                     |                                  |
| Metropolitan           | 48.1     | 20.2 (18.1-22.2)        | 17.5 (15.7-19.5)    | 2.7 (1.7-4.0)                    |
| Non-Metropolitan       | 51.9     | 22.5 (19.99-            | 20.3 (18.1-22.7)    | 2.2 (1.6-3.0)                    |
| <i>P</i> value         |          | 0.09                    | <b>0.04</b>         | 0.50                             |
| Region of residence    |          |                         |                     |                                  |
| Northeast              | 20.9     | 21.7 (17.3-26.2)        | 19.0 (14.9-24.0)    | 2.7 (1.5-4.9)                    |
| South                  | 34.2     | 21.2 (19.1-23.4)        | 19.4 (17.4-21.5)    | 1.9 (1.3-2.6)                    |
| Midwest                | 24.2     | 20.1 (17.3-22.8)        | 18.5 (15.6-21.7)    | 1.7 (0.9-3.0)                    |
| West                   | 20.7     | 22.8 (18.1-27.5)        | 19.1 (16.1-22.5)    | 3.7 (2.2-6.3)                    |
| <i>P</i> value         |          | 0.83                    | 0.99                | 0.11                             |
| Regular source of care |          |                         |                     |                                  |
| No                     | 21.1     | 20.4 (17.6-23.2)        | 17.0 (14.5-19.8)    | 2.3 (1.5-3.6)                    |
| Yes                    | 79.0     | 21.6 (19.8-23.5)        | 19.4 (17.8-21.2)    | 3.5 (2.8-4.3)                    |
| <i>P</i> value         |          | <b>0.004</b>            | <b>0.004</b>        | <b>0.03</b>                      |
| Veteran                |          |                         |                     |                                  |
| No                     | 80.9     | 20.1 (18.6-21.7)        | 18.1 (16.7-19.7)    | 2.0 (1.5-2.7)                    |
| Yes                    | 19.1     | 26.5 (22.5-30.9)        | 21.6 (19.0-24.5)    | 4.8 (2.8-8.1)                    |
| <i>P</i> value         |          | <b>&lt;0.001</b>        | <b>&lt;0.001</b>    | <b>&lt;0.001</b>                 |

Abbreviations: NAFLD, nonalcoholic fatty liver disease; NHANES III, Third National Health and Nutrition Examination Survey; CI, confidence interval. *P* value chi square test of overall difference <sup>a</sup> Poor: Poverty Income Ratio (PIR) <1, Near Poor: PIR 1-2, Above poverty level: PIR>2

Web Table 2. Age-Adjusted Prevalence of Hepatic Steatosis, NAFLD and Steatosis-no NAFLD, by different characteristics. U.S. Population, NHANES III, 1988-1994, Adults 20-74 years of age.

|                                           | Prevalence of the Risk Factor among the sample (95% CI) | Prevalence of steatosis | Prevalence of NAFLD | Prevalence of Steatosis-no NAFLD |
|-------------------------------------------|---------------------------------------------------------|-------------------------|---------------------|----------------------------------|
| <b>BMI category</b>                       |                                                         |                         |                     |                                  |
| <18.5                                     | 2.2 (1.8-2.6)                                           | 12.6                    | 11.9                | 0.8                              |
| 18.5-24.9                                 | 40.7 (38.8-42.7)                                        | 8.7                     | 7.5                 | 1.3                              |
| 25-29.9                                   | 33.6 (32.4-34.9)                                        | 22.0                    | 19.3                | 2.7                              |
| 30-34.5+                                  | 15.4 (14.5-16.4)                                        | 35.1                    | 30.9                | 4.2                              |
| 35+                                       | 8.1 (7.0-9.3)                                           | 51.8                    | 48.5                | 3.3                              |
| <i>P</i> value                            |                                                         | <b>&lt;0.0001</b>       | <b>&lt;0.0001</b>   | <b>&lt;0.0001</b>                |
| <b>Diabetes<sup>a</sup></b>               |                                                         |                         |                     |                                  |
| No                                        | 91.5 (90.6-92.2)                                        | 19.4                    | 17.2                | 2.2                              |
| Yes                                       | 8.6 (7.8-9.4)                                           | 40.7                    | 35.5                | 5.2                              |
| <i>P</i> value                            |                                                         | <b>&lt;0.0001</b>       | <b>&lt;0.0001</b>   | <b>&lt;0.0001</b>                |
| <b>Hypertension<sup>b</sup></b>           |                                                         |                         |                     |                                  |
| No                                        | 74.0 (72.5-75.5)                                        | 18.0                    | 16.4                | 1.6                              |
| Yes                                       | 26.0 (24.5-27.5)                                        | 31.1                    | 26.1                | 5.1                              |
| <i>P</i> value                            |                                                         | <b>&lt;0.0001</b>       | <b>&lt;0.0001</b>   | <b>&lt;0.0001</b>                |
| <b>Hypercholesterolemia<sup>c</sup></b>   |                                                         |                         |                     |                                  |
| No                                        | 66.9 (65.5-68.2)                                        | 19.5                    | 17.7                | 1.9                              |
| Yes                                       | 33.1 (31.8-34.5)                                        | 25.7                    | 22.4                | 3.3                              |
| <i>P</i> value                            |                                                         | <b>&lt;0.0001</b>       | <b>&lt;0.0001</b>   | <b>&lt;0.001</b>                 |
| <b>Prevalent CVD</b>                      |                                                         |                         |                     |                                  |
| No                                        | 94.7 (94.1-95.3)                                        | 20.9                    | 18.5                | 2.4                              |
| Yes                                       | 5.3 (4.7-5.9)                                           | 31.3                    | 29.4                | 1.9                              |
| <i>P</i> value                            |                                                         | <b>&lt;0.0001</b>       | <b>&lt;0.0001</b>   | 0.50                             |
| <b>Smoking</b>                            |                                                         |                         |                     |                                  |
| Never                                     | 44.2 (42.5-46.0)                                        | 20.5                    | 19.0                | 1.5                              |
| Former                                    | 27.6 (26.4-28.8)                                        | 25.3                    | 22.7                | 2.6                              |
| Current                                   | 28.2 (26.5-29.9)                                        | 18.1                    | 14.7                | 3.4                              |
| <i>P</i> value                            |                                                         | <b>&lt;0.0001</b>       | <b>&lt;0.0001</b>   | <b>0.01</b>                      |
| <b>Alcohol consumption</b>                |                                                         |                         |                     |                                  |
| Never                                     | 12.5 (11.3-13.9)                                        | 22.6                    | 22.6                | 0                                |
| Moderate                                  | 78.3 (76.8-79.7)                                        | 20.5                    | 20.5                | 0                                |
| Elevated                                  | 9.2 (8.0-10.5)                                          | 27.1                    | 0                   | 27.1                             |
| <b>Sedentary</b>                          |                                                         |                         |                     |                                  |
| No                                        | 21.0 (19.1-23.0)                                        | 20.2                    | 17.9                | 2.3                              |
| Yes                                       | 79.0 (77.1-80.9)                                        | 25.9                    | 23.2                | 2.7                              |
| <i>P</i> value                            |                                                         | <b>&lt;0.0001</b>       | <b>&lt;0.0001</b>   | 0.42                             |
| <b>Elevated ALT<sup>d</sup></b>           |                                                         |                         |                     |                                  |
| No                                        | 93.9 (92.8-94.9)                                        | 19.5                    | 17.5                | 2.0                              |
| Yes                                       | 6.0 (5.0-7.2)                                           | 50.5                    | 40.9                | 9.5                              |
| <i>P</i> value                            |                                                         | <b>&lt;0.0001</b>       | <b>&lt;0.0001</b>   | <b>&lt;0.0001</b>                |
| <b>Elevated AST<sup>e</sup></b>           |                                                         |                         |                     |                                  |
| No                                        | 94.4 (93.6-95.1)                                        | 20.0                    | 18.1                | 1.8                              |
| Yes                                       | 5.6 (4.9-6.4)                                           | 45.7                    | 34.0                | 11.7                             |
| <i>P</i> value                            |                                                         | <b>&lt;0.0001</b>       | <b>&lt;0.0001</b>   | <b>&lt;0.0001</b>                |
| <b>Elevated GGT<sup>f</sup></b>           |                                                         |                         |                     |                                  |
| No                                        | 85.6 (84.3-86.9)                                        | 18.2                    | 16.7                | 1.5                              |
| Yes                                       | 14.4 (13.1-15.7)                                        | 39.7                    | 32.8                | 6.9                              |
| <i>P</i> value                            |                                                         | <b>&lt;0.0001</b>       | <b>&lt;0.0001</b>   | <b>&lt;0.0001</b>                |
| <b>Elevated Triglycerides<sup>g</sup></b> |                                                         |                         |                     |                                  |
| No                                        | 68.4 (66.5-70.3)                                        | 14.0                    | 12.1                | 1.9                              |
| Yes                                       | 31.6 (29.7-33.5)                                        | 34.0                    | 31.5                | 2.5                              |
| <i>P</i> value                            |                                                         | <b>&lt;0.0001</b>       | <b>&lt;0.0001</b>   | 0.07                             |
| <b>Insulin Resistance<sup>h</sup></b>     |                                                         |                         |                     |                                  |
| No                                        | 72.9 (71.1-74.6)                                        | 11.2                    | 9.9                 | 1.4                              |

|                |                  |                   |                   |              |
|----------------|------------------|-------------------|-------------------|--------------|
| Yes            | 27.1 (25.4-28.9) | 40.3              | 37.4              | 2.8          |
| <i>P</i> value |                  | <b>&lt;0.0001</b> | <b>&lt;0.0001</b> | <b>0.003</b> |

*P* value is for a chi square test of overall difference

Abbreviations: NAFLD, nonalcoholic fatty liver disease; NHANES III, Third National Health and Nutrition Examination Survey.

<sup>a</sup>Diabetes=Self-reported physician diagnosis, medication use, fasting plasma glucose  $\geq$  126 mg/dl or random plasma glucose  $\geq$ 200 mg/dl. <sup>b</sup>Hypertension: Self-reported physician diagnosis, medication use, systolic blood pressure  $\geq$ 140 mmHg or diastolic blood pressure  $\geq$ 90 mmHg. <sup>c</sup>Hypercholesterolemia: Self-reported physician diagnosis, medication use or total cholesterol  $>$ 240 mg/dl. <sup>d</sup> Elevated ALT:  $>$ 40 U/l for men and  $>$ 31 U/l for women, <sup>e</sup>AST:  $>$ 37 U/l for men and  $>$ 31 U/l for women, <sup>f</sup>GGT:  $>$ 51 U/L for men and  $>$ 33 U/L for women (sample for GGT analyses 9738) <sup>g</sup> Fasting,  $>$ 150 mg/dl. <sup>h</sup> HOMA-IR  $\geq$ 2.86 (top quartile) among people without diabetes.
